# Supplementary material for: Fluffy feathers: how neoptile feathers contribute to camouflage in precocial chicks
Source: bioRxiv or medRxiv preprint supplement (doi:10.1101/2020.07.26.221671), 2020-07-30
Supplement: Supplementary file [file media-1.pdf]

1 Fluffy feathers: how neoptile feathers contribute to  
2 camouflage in precocial chicks - Supplementary material

3 **Authors:** Veronika A. Rohr<sup>1,2</sup>, Tamara Volkmer<sup>3</sup>, Dirk Metzler<sup>2</sup>, Clemens Küpper<sup>1</sup>

4 <sup>1</sup> Research Group for Behavioural Genetics and Evolutionary Ecology, Max Planck Institute for  
5 Ornithology, Seewiesen, Germany

6 <sup>2</sup> Division of Evolutionary Biology, Faculty of Biology, Ludwig-Maximilians-Universität München,  
7 Planegg-Martinsried, Germany

8 <sup>3</sup> Department of Migration, Max Planck Institute of Animal Behavior, Radolfzell, Germany

9 **Mail:** vrohr@orn.mpg.de; ckuepper@orn.mpg.de

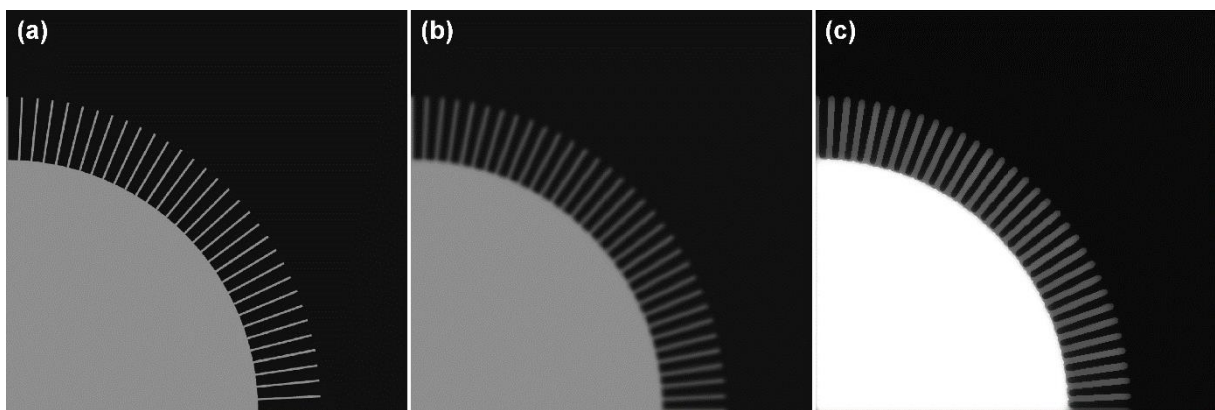

10  
11 **Figure S1:** Modelling human vision with an acuity of 72 cpd. (a) Cone catch image (b) Gaussian Acuity Control (c) Edge  
12 reconstruction with Receptor Noise Limited (RNL) filter. All images exist as a stack of 4 channels (long, medium and short  
13 wave, and luminance).

14 **Table S1:** Parameter combinations used in Experiment 1. Differences to Basic Scenario indicated in shaded cells

| Parameter comb. index | Scenario                         | Number of appendages | Appendage thickness<br>(Pt/px/mm) | Distance between appendages<br>(px/mm) | Appendage transparency | Length heterogeneity | Background | Acuity<br>(cpd) |
|-----------------------|----------------------------------|----------------------|-----------------------------------|----------------------------------------|------------------------|----------------------|------------|-----------------|
| a                     | Basic Scenario                   | 0                    | 1/4/0.4                           | -                                      | 0%                     | all 100% length      | dark grey  | 72              |
| b                     |                                  | 32                   |                                   | 88/7.5                                 |                        |                      |            |                 |
| c                     |                                  | 64                   |                                   | 42/3.6                                 |                        |                      |            |                 |
| d                     |                                  | 128                  |                                   | 19/1.6                                 |                        |                      |            |                 |
| e                     |                                  | 256                  |                                   | 7/0.6                                  |                        |                      |            |                 |
| f                     |                                  | 512                  |                                   | 2/0.1                                  |                        |                      |            |                 |
| g                     |                                  | full circle          |                                   | -                                      |                        |                      |            |                 |
| h                     | Scenario 1a:<br>2 Pt Thickness   | 0                    | 2/8/0.7                           | -                                      | 0%                     | all 100% length      | dark grey  | 72              |
| i                     |                                  | 32                   |                                   | 84/7.1                                 |                        |                      |            |                 |
| j                     |                                  | 64                   |                                   | 38/3.2                                 |                        |                      |            |                 |
| k                     |                                  | 128                  |                                   | 15/1.3                                 |                        |                      |            |                 |
| l                     |                                  | 256                  |                                   | 3/0.3                                  |                        |                      |            |                 |
| m                     |                                  | 512                  |                                   | -2/-0.2                                |                        |                      |            |                 |
| n                     |                                  | full circle          |                                   | -                                      |                        |                      |            |                 |
| o                     | Scenario 1b:<br>3 Pt Thickness   | 0                    | 3/12/1.1                          | -                                      | 0%                     | all 100% length      | dark grey  | 72              |
| p                     |                                  | 32                   |                                   | 80/6.8                                 |                        |                      |            |                 |
| q                     |                                  | 64                   |                                   | 34/2.9                                 |                        |                      |            |                 |
| r                     |                                  | 128                  |                                   | 11/0.9                                 |                        |                      |            |                 |
| s                     |                                  | 256                  |                                   | -1/-0.1                                |                        |                      |            |                 |
| t                     |                                  | 512                  |                                   | -7/-0.6                                |                        |                      |            |                 |
| u                     |                                  | full circle          |                                   | -                                      |                        |                      |            |                 |
| v                     | Scenario 2a:<br>25% Transparency | 0                    | 1/4/0.4                           | -                                      | 25%                    | all 100% length      | dark grey  | 72              |
| w                     |                                  | 32                   |                                   | 88/7.5                                 |                        |                      |            |                 |
| x                     |                                  | 64                   |                                   | 42/3.6                                 |                        |                      |            |                 |
| y                     |                                  | 128                  |                                   | 19/1.6                                 |                        |                      |            |                 |
| z                     |                                  | 256                  |                                   | 7/0.6                                  |                        |                      |            |                 |
| aa                    |                                  | 512                  |                                   | 2/0.1                                  |                        |                      |            |                 |
| ab                    |                                  | full circle          |                                   | -                                      |                        |                      |            |                 |
| ac                    | Scenario 2b:<br>50% Transparency | 0                    | 1/4/0.4                           | -                                      | 50%                    | all 100% length      | dark grey  | 72              |
| ad                    |                                  | 32                   |                                   | 88/7.5                                 |                        |                      |            |                 |
| ae                    |                                  | 64                   |                                   | 42/3.6                                 |                        |                      |            |                 |
| af                    |                                  | 128                  |                                   | 19/1.6                                 |                        |                      |            |                 |
| ag                    |                                  | 256                  |                                   | 7/0.6                                  |                        |                      |            |                 |
| ah                    |                                  | 512                  |                                   | 2/0.1                                  |                        |                      |            |                 |
| ai                    |                                  | full circle          |                                   | -                                      |                        |                      |            |                 |

15

|    |                                                   |             |         |        |    |                                   |                                     |    |
|----|---------------------------------------------------|-------------|---------|--------|----|-----------------------------------|-------------------------------------|----|
| aj | Scenario 3a:<br>1/2 at 50% length                 | 0           | 1/4/0.4 | -      | 0% | 1/2 at 50% length                 | dark grey                           | 72 |
| ak |                                                   | 32          |         | 88/7.5 |    |                                   |                                     |    |
| al |                                                   | 64          |         | 42/3.6 |    |                                   |                                     |    |
| am |                                                   | 128         |         | 19/1.6 |    |                                   |                                     |    |
| an |                                                   | 256         |         | 7/0.6  |    |                                   |                                     |    |
| ao |                                                   | 512         |         | 2/0.1  |    |                                   |                                     |    |
| ap |                                                   | full circle |         | -      |    |                                   |                                     |    |
| aq | Scenario 3b:<br>1/2 at 25% &<br>1/4 at 50% length | 0           | 1/4/0.4 | -      | 0% | 1/2 at 25% &<br>1/4 at 50% length | dark grey                           | 72 |
| ar |                                                   | 32          |         | 88/7.5 |    |                                   |                                     |    |
| as |                                                   | 64          |         | 42/3.6 |    |                                   |                                     |    |
| at |                                                   | 128         |         | 19/1.6 |    |                                   |                                     |    |
| au |                                                   | 256         |         | 7/0.6  |    |                                   |                                     |    |
| av |                                                   | 512         |         | 2/0.1  |    |                                   |                                     |    |
| aw |                                                   | full circle |         | -      |    |                                   |                                     |    |
| ax | Scenario 4a:<br>background - big tiles            | 0           | 1/4/0.4 | -      | 0% | all 100% length                   | chessboard fields<br>346 px/29.3 mm | 72 |
| ay |                                                   | 32          |         | 88/7.5 |    |                                   |                                     |    |
| az |                                                   | 64          |         | 42/3.6 |    |                                   |                                     |    |
| ba |                                                   | 128         |         | 19/1.6 |    |                                   |                                     |    |
| bb |                                                   | 256         |         | 7/0.6  |    |                                   |                                     |    |
| bc |                                                   | 512         |         | 2/0.1  |    |                                   |                                     |    |
| bd |                                                   | full circle |         | -      |    |                                   |                                     |    |
| be | Scenario 4b:<br>background - small tiles          | 0           | 1/4/0.4 | -      | 0% | all 100% length                   | chessboard fields 86<br>px/7.3 mm   | 72 |
| bf |                                                   | 32          |         | 88/7.5 |    |                                   |                                     |    |
| bg |                                                   | 64          |         | 42/3.6 |    |                                   |                                     |    |
| bh |                                                   | 128         |         | 19/1.6 |    |                                   |                                     |    |
| bi |                                                   | 256         |         | 7/0.6  |    |                                   |                                     |    |
| bj |                                                   | 512         |         | 2/0.1  |    |                                   |                                     |    |
| bk |                                                   | full circle |         | -      |    |                                   |                                     |    |
| bl | Scenario 5a:<br>30 cpd acuity                     | 0           | 1/4/0.4 | -      | 0% | all 100% length                   | dark grey                           | 30 |
| bm |                                                   | 32          |         | 88/7.5 |    |                                   |                                     |    |
| bn |                                                   | 64          |         | 42/3.6 |    |                                   |                                     |    |
| bo |                                                   | 128         |         | 19/1.6 |    |                                   |                                     |    |
| bp |                                                   | 256         |         | 7/0.6  |    |                                   |                                     |    |
| bq |                                                   | 512         |         | 2/0.1  |    |                                   |                                     |    |
| br |                                                   | full circle |         | -      |    |                                   |                                     |    |
| bs | Scenario 5b:<br>10 cpd acuity                     | 0           | 1/4/0.4 | -      | 0% | all 100% length                   | dark grey                           | 10 |
| bt |                                                   | 32          |         | 88/7.5 |    |                                   |                                     |    |
| bu |                                                   | 64          |         | 42/3.6 |    |                                   |                                     |    |
| bv |                                                   | 128         |         | 19/1.6 |    |                                   |                                     |    |
| bw |                                                   | 256         |         | 7/0.6  |    |                                   |                                     |    |
| bx |                                                   | 512         |         | 2/0.1  |    |                                   |                                     |    |
| by |                                                   | full circle |         | -      |    |                                   |                                     |    |

16 **Table S2:** Spatial acuity of humans and potential chick predators.

| Spatial acuity approximation | Potential predator of snowy plover chicks                                          | Related species with known spatial acuity                                                                          | Spatial acuity   |
|------------------------------|------------------------------------------------------------------------------------|--------------------------------------------------------------------------------------------------------------------|------------------|
| High (72 cpd)                | Human ( <i>Homo sapiens</i> )                                                      | human ( <i>Homo sapiens</i> ) – (Land 1981, Hirsch and Curcio 1989, Land and Nilsson 2012, Caves and Johnsen 2018) | 72 – 73 cpd      |
|                              | Birds of prey (Page et al. 1985, Mabee and Estelle 2000)                           | Brown Falcon ( <i>Falco berigora</i> ) – (Reymond 1987)                                                            | 73 cpd           |
| Medium (30 cpd)              | Crested caracaras ( <i>Caracara cheriway</i> ) – (C Küpper, personal observations) | Chimango caracara ( <i>Phalcoboenus chimango</i> ) – (Potier et al. 2016, Caves et al. 2018)                       | 15 – 40 cpd      |
|                              | Corvids – (Page et al. 1985, Mabee and Estelle 2000)                               | Several corvids – (Dabrowska 1975, Caves et al. 2018)                                                              | 30 – 33 cpd      |
|                              | Raccoon ( <i>Procyon lotor</i> ) – (Stoddard et al. 2016)                          | Raccoons ( <i>Procyon lotor</i> ) – (Johnson and Michels 1958)                                                     | 25 – 30 cpd      |
| Low (10 cpd)                 | Feral dog ( <i>Canis familiaris</i> ) – (Stoddard et al. 2016)                     | Dog ( <i>Canis familiaris</i> ) – (Bromberg and Dawson 1980, Odom et al. 1983, Pretterer et al. 2004)              | 4.62 – 12.59 cpd |
|                              | Coyote ( <i>Canis latrans</i> ) – (Stoddard et al. 2016)                           |                                                                                                                    |                  |
|                              | Bobcat ( <i>Lynx rufus</i> ) – (Stoddard et al. 2016)                              | European lynx ( <i>Lynx europaea</i> ) – (Maffei et al. 1990)                                                      | 7 – 8 cpd        |
|                              |                                                                                    | Cat ( <i>Felis catus</i> ) – (Wässle 1971, Caves and Johnsen 2018)                                                 | 10 cpd           |

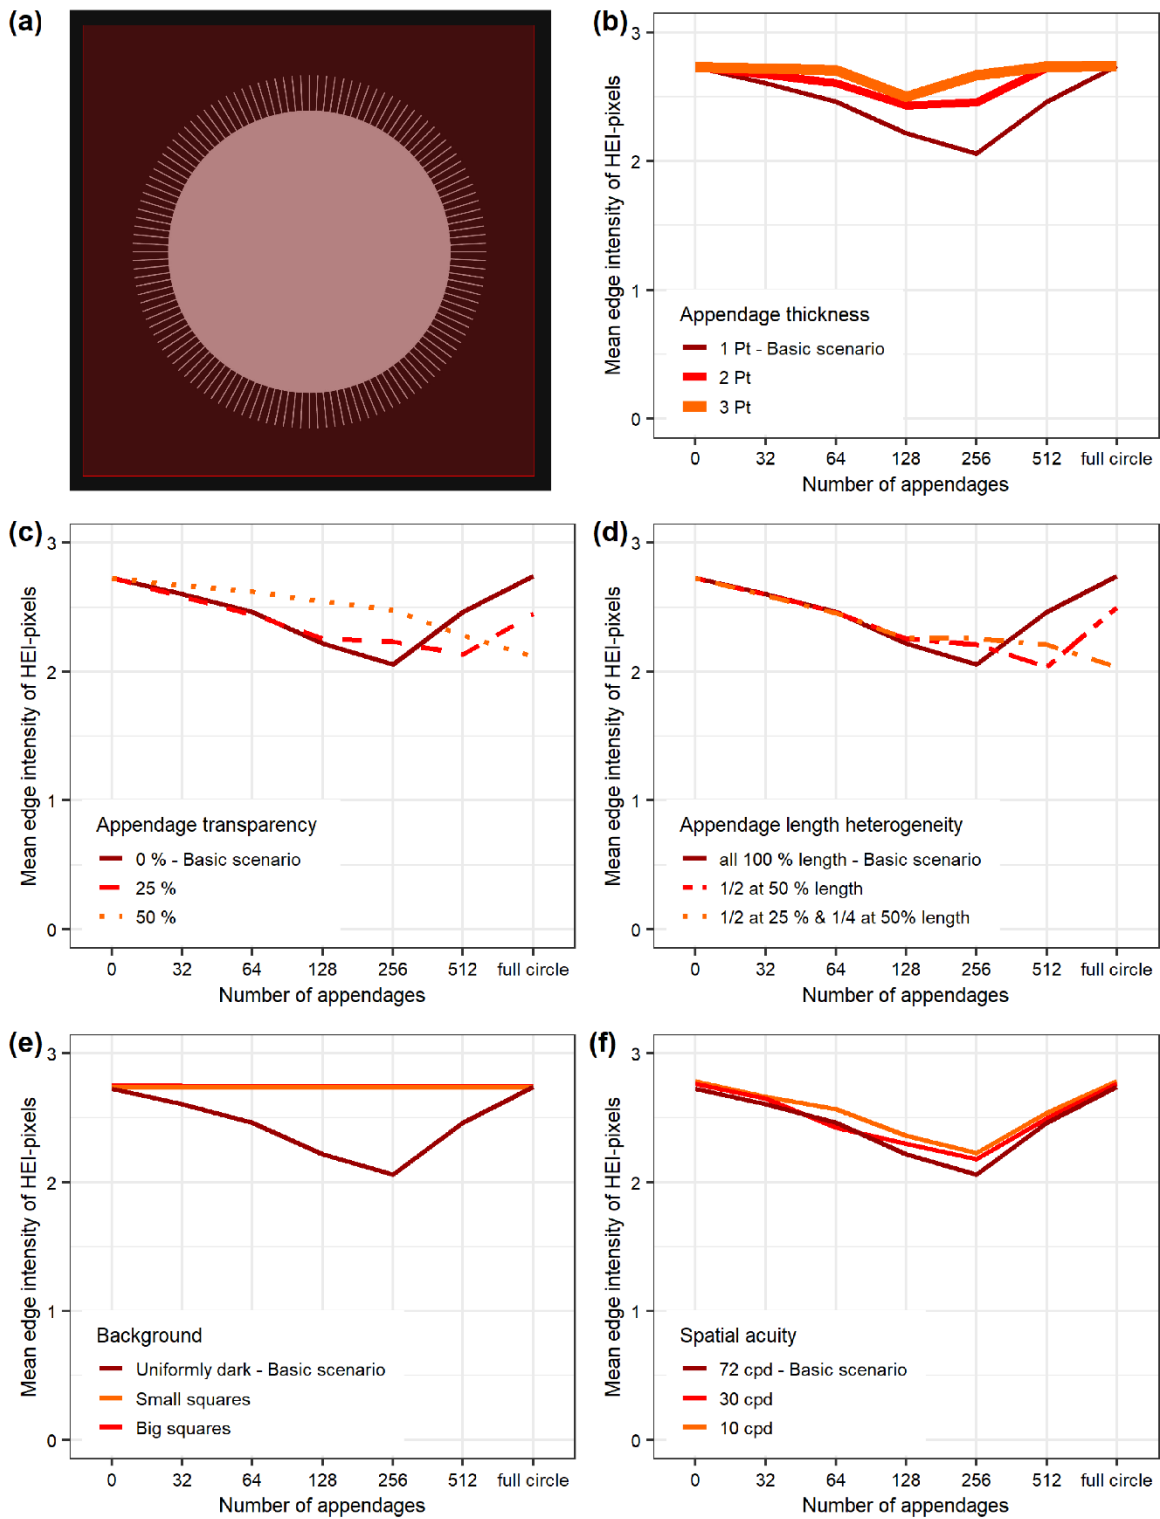

17

18 **Figure S2:** Local edge intensity analysis in experiment 1 with an expanded region of interest (ROI). The highest 0.37 % of the  
 19 pixels are classified as “High Edge Intensity-pixels” (HEI-pixels). (a) ROI is a 1500 x 1500 pixel-wide rectangle (red). (b) Scenario  
 20 1: variation in appendage thickness. (c) Scenario 2: variation in appendage transparency. (d) Scenario 3: variation in  
 21 appendage length. (e) Scenario 4: variation in background complexity. Note that the “Big squares” and “Small squares” curves  
 22 overlap fully. (f) Scenario 5: variation in spatial acuity.

23 **Table S3:** General characterisation of the chick images. Percentage values of ROI available for analysis.

| Chick ID | Feather region excl. shadow | Contour region excl. shadow | HEI-pixels threshold |
|----------|-----------------------------|-----------------------------|----------------------|
| CN0333   | 77%                         | 75%                         | 0.9859               |
| CN0339   | 57%                         | 58%                         | 0.9827               |
| CN0340   | 61%                         | 62%                         | 0.9789               |
| CN0345   | 88%                         | 82%                         | 0.9815               |
| CN0347   | 61%                         | 59%                         | 0.9839               |
| CN0350   | 82%                         | 82%                         | 0.9829               |
| CN0353   | 91%                         | 89%                         | 0.9789               |
| CN0356   | 58%                         | 58%                         | 0.9830               |
| CN0360   | 64%                         | 64%                         | 0.9854               |
| CN0361   | 100%                        | 100%                        | 0.9840               |
| CN0363   | 100%                        | 100%                        | 0.9789               |
| CN0364   | 81%                         | 78%                         | 0.9846               |
| CN0367   | 58%                         | 56%                         | 0.9858               |
| CN0411   | 66%                         | 56%                         | 0.9821               |
| CN0415   | 57%                         | 55%                         | 0.9800               |
| Mean     | 73%                         | 72%                         | 0.9826               |

## 24 References

- 25 Bromberg, N. M. and Dawson, W. W. 1980. Preliminary measures of canine visual spatial resolution  
 26 with electrophysiological techniques. - *Trans. Am. Coll. Vet. Opth. Soc.* 11: 120–125.
- 27 Caves, E. M. and Johnsen, S. 2018. AcuityView: An r package for portraying the effects of visual acuity  
 28 on scenes observed by an animal. - *Methods Ecol. Evol.* 9: 793–797.
- 29 Caves, E. M. et al. 2018. Visual acuity and the evolution of signals. - *Trends Ecol. Evol.* 33: 358–372.
- 30 Dabrowska, B. 1975. Investigations on visual acuity of some corvine species. - *Folia Biol.* 23: 311.
- 31 Endler, J. A. 1981. An overview of the relationships between mimicry and crypsis. - *Biol. J. Linn. Soc.*  
 32 *Lond.* 16: 25–31.
- 33 Hirsch, J. and Curcio, C. A. 1989. The spatial resolution capacity of human foveal retina. - *Vision Res.*  
 34 29: 1095–1101.
- 35 Johnson, J. I. and Michels, K. M. 1958. Discrimination of small intervals and objects by raccoons. - *Anim.*  
 36 *Behav.* 6: 164–170.
- 37 Land, M. F. 1981. Optics and vision in invertebrates. - *Handb. Sens. Physiol. (Handbook of sensory*  
 38 *physiology) VII/6B:* 471–592.
- 39 Land, M. F. and Nilsson, D.-E. 2012. *Animal eyes.* - Oxford Univ. Press.

- 40 Mabee, T. J. and Estelle, V. B. 2000. Assessing the effectiveness of predator exclosures for plovers. -  
41 Wilson Bull. 112: 14–20.
- 42 Maffei, L. et al. 1990. The visual acuity of the lynx. - Vision Res. 30: 527–528.
- 43 Odom, J. V. et al. 1983. Canine visual acuity: retinal and cortical field potentials evoked by pattern  
44 stimulation. - Am. J. Physiol. 245: R637-41.
- 45 Page, G. W. et al. 1985. Nest site selection and clutch predation in the snowy plover. - Auk 102: 347–  
46 353.
- 47 Potier, S. et al. 2016. Visual acuity in an opportunistic raptor, the chimango caracara (*Milvago*  
48 *chimango*). - Physiol. Behav. 157: 125–128.
- 49 Pretterer, G. et al. 2004. Brightness discrimination in the dog. - J. Vis. 4: 241–249.
- 50 Reymond, L. 1987. Spatial visual acuity of the falcon, *Falco berigora*: A behavioural, optical and  
51 anatomical investigation. - Vision Res. 27: 1859–1874.
- 52 Stoddard, M. C. et al. 2016. Camouflage and clutch survival in plovers and terns. - Sci. Rep. 6: 32059.
- 53 Wässle, H. 1971. Optical quality of the cat eye. - Vision Res. 11: 995-IN14.
